# Supplementary material
Source: publisher figshare collection journal article supplement (https://asha.figshare.com/articles/dataset/_/21313713)
Supplement: Supplementary file 1 [file 1]

**Supplemental Material S2.** Target words and their psycholinguistic properties.

| Target Word | Valence  | Concreteness | Valence | Arousal | CNC | KFFRQ | NLET |
|-------------|----------|--------------|---------|---------|-----|-------|------|
| crisis      | Negative | Abstract     | 2.74    | 5.00    | 319 | 82    | 6    |
| neglect     | Negative | Abstract     | 2.63    | 5.00    | 282 | 12    | 7    |
| malice      | Negative | Abstract     | 2.69    | 6.00    | 248 | 2     | 6    |
| betrayal    | Negative | Abstract     | 1.68    | 7.00    | 320 | 6     | 8    |
| anguish     | Negative | Abstract     | 2.12    | 5.00    | 280 |       | 7    |
| fraud       | Negative | Abstract     | 2.67    | 6.00    | 304 | 8     | 5    |
| panic       | Negative | Abstract     | 3.12    | 7.00    | 324 | 22    | 5    |
| loneliness  | Negative | Abstract     | 1.61    | 5.00    | 287 |       | 10   |
| failure     | Negative | Abstract     | 1.70    | 5.00    | 282 | 89    | 7    |
| hatred      | Negative | Abstract     | 1.98    | 7.00    | 239 | 20    | 6    |
| assault     | Negative | Concrete     | 2.03    | 8.00    | 410 | 15    | 7    |
| abuse       | Negative | Concrete     | 1.80    | 6.83    | 420 | 18    | 5    |
| victim      | Negative | Concrete     | 2.18    | 6.00    | 467 | 27    | 6    |
| hooker      | Negative | Concrete     | 3.34    | 5.00    | 633 |       | 6    |
| infection   | Negative | Concrete     | 1.66    | 5.00    | 468 | 8     | 9    |
| slave       | Negative | Concrete     | 1.84    | 6.00    | 539 | 30    | 5    |
| pollution   | Negative | Concrete     | 1.85    | 6.00    | 463 | 6     | 9    |
| torture     | Negative | Concrete     | 1.56    | 6.00    | 437 | 3     | 7    |
| murderer    | Negative | Concrete     | 1.53    | 7.00    | 647 | 19    | 8    |
| injuries    | Negative | Concrete     | 2.49    | 6.00    | 497 | 27    | 8    |
| context     | Neutral  | Abstract     | 5.20    | 4.22    | 314 | 35    | 7    |
| modesty     | Neutral  | Abstract     | 5.76    | 4.00    | 293 | 4     | 7    |
| investment  | Neutral  | Abstract     | 5.93    | 5.00    | 347 | 43    | 10   |
| custom      | Neutral  | Abstract     | 5.85    | 4.66    | 323 | 14    | 6    |
| aloofness   | Neutral  | Abstract     | 4.90    | 4.00    | 253 |       | 9    |
| skeptic     | Neutral  | Abstract     | 4.52    | 5.00    | 287 |       | 7    |
| theory      | Neutral  | Abstract     | 5.30    | 5.00    | 287 | 129   | 6    |
| defiance    | Neutral  | Abstract     | 4.26    | 6.00    | 275 | 7     | 8    |
| neurotic    | Neutral  | Abstract     | 4.45    | 5.00    | 267 | 10    | 8    |
| reserve     | Neutral  | Abstract     | 4.88    | 3.00    | 287 | 37    | 7    |
| skyscraper  | Neutral  | Concrete     | 5.88    | 5.71    | 618 | 2     | 10   |
| lightning   | Neutral  | Concrete     | 4.57    | 7.00    | 525 | 14    | 9    |
| pamphlet    | Neutral  | Concrete     | 4.79    | 3.62    | 700 | 3     | 8    |
| detail      | Neutral  | Concrete     | 5.55    | 4.00    | 413 | 72    | 6    |
| journal     | Neutral  | Concrete     | 5.14    | 4.00    | 563 | 42    | 7    |
| writer      | Neutral  | Concrete     | 5.52    | 4.00    | 680 | 73    | 6    |
| storm       | Neutral  | Concrete     | 4.95    | 6.00    | 527 | 26    | 5    |
| reptiles    | Neutral  | Concrete     | 4.77    | 5.00    | 578 |       | 7    |
| doctor      | Neutral  | Concrete     | 5.20    | 5.86    | 575 | 100   | 6    |
| material    | Neutral  | Concrete     | 5.26    | 4.05    | 539 | 174   | 8    |
| progress    | Positive | Abstract     | 7.73    | 6.00    | 313 | 120   | 8    |
| talent      | Positive | Abstract     | 7.04    | 6.00    | 281 | 19    | 8    |
| liberty     | Positive | Abstract     | 7.98    | 6.00    | 302 | 46    | 7    |

|             |          |          |      |      |     |     |    |
|-------------|----------|----------|------|------|-----|-----|----|
| excellence  | Positive | Abstract | 8.38 | 6.00 | 273 | 15  | 10 |
| respect     | Positive | Abstract | 7.64 | 5.00 | 280 | 125 | 7  |
| success     | Positive | Abstract | 8.29 | 6.00 | 295 | 93  | 7  |
| peace       | Positive | Abstract | 7.72 | 3.00 | 309 | 198 | 5  |
| acceptance  | Positive | Abstract | 7.98 | 5.00 | 280 | 49  | 10 |
| delight     | Positive | Abstract | 8.26 | 5.00 | 282 | 29  | 7  |
| kindness    | Positive | Abstract | 7.82 | 4.00 | 261 | 5   | 8  |
| sunrise     | Positive | Concrete | 7.86 | 5.00 | 660 | 10  | 7  |
| family      | Positive | Concrete | 7.65 | 5.00 | 525 | 331 | 6  |
| savior      | Positive | Concrete | 7.73 | 6.00 | 473 |     | 6  |
| queen       | Positive | Concrete | 6.44 | 5.00 | 537 | 41  | 5  |
| valentine   | Positive | Concrete | 8.11 | 6.00 | 527 | 2   | 9  |
| scholar     | Positive | Concrete | 7.26 | 5.00 | 450 | 15  | 7  |
| achievement | Positive | Concrete | 7.89 | 6.00 | 407 | 65  | 11 |
| adventure   | Positive | Concrete | 7.60 | 7.00 | 393 | 14  | 9  |
| champion    | Positive | Concrete | 8.44 | 6.00 | 459 | 23  | 8  |
| riches      | Positive | Concrete | 7.70 | 6.00 | 427 | 2   | 6  |
