# Supplementary material
Source: publisher figshare collection journal article supplement (https://asha.figshare.com/articles/dataset/_/21313713)
Supplement: Supplementary file 2 [file 1]

**Supplemental Material S5.** Results of the best model from the linear mixed model – response time analysis.

**Type III Tests of Fixed Effects<sup>a</sup>**

| <b>Source</b> | <b>Numerator<br/><i>df</i></b> | <b>Denominator<br/><i>df</i></b> | <b><i>F</i></b> | <b>Sig.</b> |
|---------------|--------------------------------|----------------------------------|-----------------|-------------|
| Intercept     | 1                              | 39.000                           | 59991.337       | 0.000       |
| WorkingMemory | 1                              | 39.000                           | 20.634          | 0.000       |
| Inhibition    | 1                              | 39.000                           | 10.816          | 0.002       |

a. Dependent Variable: LogRTs.

**Estimates of Fixed Effects<sup>a</sup>**

| <b>Parameter</b> | <b>Estimate</b> | <b>Std. Error</b> | <b><i>df</i></b> | <b><i>t</i></b> | <b>Sig.</b> | <b>95% Confidence Interval</b> |                    |
|------------------|-----------------|-------------------|------------------|-----------------|-------------|--------------------------------|--------------------|
|                  |                 |                   |                  |                 |             | <b>Lower Bound</b>             | <b>Upper Bound</b> |
| Intercept        | 8.571700        | 0.034996          | 39.000           | 244.931         | 0.000       | 8.500914                       | 8.642487           |
| WorkingMemory    | -0.164755       | 0.036270          | 39.000           | -4.542          | 0.000       | -0.238119                      | -0.091392          |
| Inhibition       | -0.116101       | 0.035302          | 39.000           | -3.289          | 0.002       | -0.187506                      | -0.044696          |

a. Dependent Variable: LogRTs.
