# Supplementary material
Source: publisher figshare collection journal article supplement (https://asha.figshare.com/articles/dataset/_/21313713)
Supplement: Supplementary file 3 [file 1]

**Supplemental Material S6.** Predictors of response ratings and response times.

| <b>Valence Category</b> | <b>Predictors</b>       | <b><math>r^2</math></b> | <b><math>B (SE)</math></b> | <b><math>t</math>-value</b> | <b><math>p</math>-value</b> |
|-------------------------|-------------------------|-------------------------|----------------------------|-----------------------------|-----------------------------|
| <b>Response Rating</b>  |                         |                         |                            |                             |                             |
| Negative                | (Constant)              |                         | -2.823 (.132)              | 21.412                      | < .001                      |
|                         | Working Memory*         | .05                     | -0.344 (.15)               | -2.298                      | .024                        |
|                         | Working Memory x Group* | .044                    | -0.748 (.312)              | -2.4                        | .019                        |
|                         | Depression x Group*     | .011                    | -0.179 (.067)              | -2.675                      | .009                        |
|                         | Group*                  | .078                    | 1.088 (.412)               | 2.642                       | .01                         |
|                         | Total $r^2$             | .183                    |                            |                             |                             |
| Neutral                 | (Constant)              |                         | 5.031 (.084)               | 59.731                      | < .001                      |
|                         | Working Memory          | .00                     | -0.013 (.096)              | -0.135                      | .893                        |
|                         | Working Memory x Group  | .014                    | -0.172 (.199)              | -0.865                      | .39                         |
|                         | Depression x Group      | .001                    | -0.021 (.043)              | -0.498                      | .62                         |
|                         | Group                   | .01                     | 0.227 (.263)               | -0.863                      | .391                        |
|                         | Total $r^2$             | .025                    |                            |                             |                             |
| Positive                | (Constant)              |                         | 6.63 (.116)                | 57.404                      | < .001                      |
|                         | Working Memory          | .032                    | 0.25 (.131)                | 1.904                       | .061                        |
|                         | Working Memory x Group* | .094                    | 0.74 (.273)                | 2.708                       | .008                        |
|                         | Depression x Group      | .00                     | 0.085 (.059)               | 1.447                       | .152                        |
|                         | Group                   | .042                    | -0.696 (.361)              | -1.93                       | .057                        |
|                         | Total $r^2$             | .169                    |                            |                             |                             |
| <b>Response Times</b>   |                         |                         |                            |                             |                             |
|                         | (Constant)              |                         | 8.572 (.017)               | 516.258                     | < .001                      |
|                         | Working Memory*         | .237                    | -0.165 (.017)              | -9.574                      | < .001                      |
|                         | Inhibition*             | .131                    | -0.116 (.017)              | -6.932                      | < .001                      |
|                         | Total $r^2$             | .369                    |                            |                             |                             |

\*Indicates significance at  $p < .05$ .
