# Supplementary material
Source: publisher figshare collection journal article supplement (https://asha.figshare.com/articles/dataset/_/21313713)
Supplement: Supplementary file 4 [file 1]

**Supplemental Material S4.** Results of the best model from the linear mixed model – response rating analysis.

**Type III Tests of Fixed Effects<sup>a</sup>**

| <b>Source</b>                       | <b>Numerator<br/>df</b> | <b>Denominator<br/>df</b> | <b>F</b> | <b>Sig.</b> |
|-------------------------------------|-------------------------|---------------------------|----------|-------------|
| Intercept                           | 1                       | 39                        | 4502.771 | 0.000       |
| Val.code                            | 1                       | 195                       | 700.944  | 0.000       |
| Val.code * Group                    | 1                       | 195                       | 15.790   | 0.000       |
| Val.code * WorkingMemory            | 1                       | 195                       | 13.229   | 0.000       |
| Val.code * WorkingMemory *<br>Group | 1                       | 195                       | 19.153   | 0.000       |
| Val.code * Depression *<br>Group    | 1                       | 195                       | 13.073   | 0.000       |

a. Dependent Variable: Rating.

**Estimates of Fixed Effects<sup>a</sup>**

| <b>Parameter</b>                       | <b>Estimate</b> | <b>Std.<br/>Error</b> | <b>df</b> | <b>t</b> | <b>Sig.</b> | <b>95% Confidence<br/>Interval</b> |                        |
|----------------------------------------|-----------------|-----------------------|-----------|----------|-------------|------------------------------------|------------------------|
|                                        |                 |                       |           |          |             | <b>Lower<br/>Bound</b>             | <b>Upper<br/>Bound</b> |
| Intercept                              | 4.807692        | 0.071647              | 39        | 67.103   | 0.000       | 4.662773                           | 4.952612               |
| Val.code                               | 3.806746        | 0.143785              | 195       | 26.475   | 0.000       | 3.523174                           | 4.090318               |
| Val.code × Group                       | -1.783797       | 0.448905              | 195       | -3.974   | 0.000       | -2.669129                          | -0.898464              |
| Val.code ×<br>WorkingMemory            | 0.593603        | 0.163206              | 195       | 3.637    | 0.000       | 0.271727                           | 0.915479               |
| Val.code ×<br>WorkingMemory ×<br>Group | 1.487935        | 0.339993              | 195       | 4.376    | 0.000       | 0.817400                           | 2.158471               |
| Val.code ×<br>Depression * Group       | 0.264394        | 0.073125              | 195       | 3.616    | 0.000       | 0.120177                           | 0.408610               |

a. Dependent Variable: Rating.
