# Supplementary material
Source: publisher figshare collection journal article supplement (https://asha.figshare.com/articles/dataset/_/21313713)
Supplement: Supplementary file 5 [file 1]

**Supplemental Material S1.** Neutral sentence frames with associated target final word.

| Sentence Frame                                   |                 | Negative   | Neutral    | Positive    |
|--------------------------------------------------|-----------------|------------|------------|-------------|
| The article in the paper described the           | <b>Abstract</b> | crisis     | context    | progress    |
|                                                  | <b>Concrete</b> | assault    | skyscraper | sunrise     |
| The man at the desk noticed their (the)          | <b>Abstract</b> | neglect    | modesty    | talent      |
|                                                  | <b>Concrete</b> | abuse      | lightning  | family      |
| The man at the door talked about his             | <b>Abstract</b> | malice     | investment | liberty     |
|                                                  | <b>Concrete</b> | victim     | pamphlet   | savior      |
| The man in the suit acknowledged the             | <b>Abstract</b> | betrayal   | custom     | excellence  |
|                                                  | <b>Concrete</b> | hooker     | detail     | queen       |
| The man in the tie saw the woman's               | <b>Abstract</b> | anguish    | aloofness  | respect     |
|                                                  | <b>Concrete</b> | infection  | journal    | valentine   |
| The man with the coat was a                      | <b>Abstract</b> | fraud      | skeptic    | success     |
|                                                  | <b>Concrete</b> | slave      | writer     | scholar     |
| The paper on the table discussed the             | <b>Abstract</b> | panic      | theory     | peace       |
|                                                  | <b>Concrete</b> | pollution  | storm      | achievement |
| The script in review was about                   | <b>Abstract</b> | loneliness | defiance   | acceptance  |
|                                                  | <b>Concrete</b> | torture    | reptiles   | adventure   |
| The woman near the window was considered a       | <b>Abstract</b> | failure    | neurotic   | delight     |
|                                                  | <b>Concrete</b> | murderer   | doctor     | champion    |
| The woman with the gloves couldn't believe their | <b>Abstract</b> | hatred     | reserve    | kindness    |
|                                                  | <b>Concrete</b> | injuries   | material   | riches      |
