# Supplementary material
Source: publisher figshare collection journal article supplement (https://asha.figshare.com/articles/dataset/_/21313713)
Supplement: Supplementary file 6 [file 1]

**Supplemental Material S3.** Table of factor loadings from the principal components analysis of cognitive test scores.

**Rotated Component Matrix<sup>a</sup>**

|                     | <b>Component</b> |          |          |
|---------------------|------------------|----------|----------|
|                     | <b>1</b>         | <b>2</b> | <b>3</b> |
| Digit Symbol        | 0.836            | 0.278    |          |
| Digit Span Forward  | 0.796            |          |          |
| Digit Span Backward | 0.826            |          |          |
| Trails A            | -0.685           | -0.306   | 0.447    |
| Stroop X (Colors)   | 0.476            | 0.780    |          |
| Trails Interference |                  |          | -0.915   |
| Stroop Interference |                  | 0.952    |          |

Extraction Method: Principal Component Analysis.

Rotation Method: Varimax with Kaiser Normalization.<sup>a</sup>

a. Rotation converged in 5 iterations.
